# Supplementary material for: The Role of Historical Barriers in the Diversification Processes in Open Vegetation Formations during the Miocene/Pliocene Using an Ancient Rodent Lineage as a Model
Source: PubMed Central journal article supplement (PMC3630152; doi:10.1371/journal.pone.0061924), 2013-04-18
Supplement: pone.0061924.s004.pdf [file pone.0061924.s004.pdf]

**Table S1** List of *Thrichomys* specimens included in this study, their haplotype number (H), GenBank accession number, field or museum identification number (ID), localities, karyotypes and Biogeographic regions (Bio Regions).

| Species                   | ID       | H  | cytb |          | FBG |          | Locality (number in map)  | 2n/FN | Bio Regions       |
|---------------------------|----------|----|------|----------|-----|----------|---------------------------|-------|-------------------|
|                           |          |    | bp   | GenBank  | bp  | GenBank  |                           |       |                   |
| <i>T. apereoides</i>      | FC107    | 1  | 1100 | AY083341 |     |          | MG: Juramento (1)         | 28/50 | Southern Caatinga |
| <i>T. apereoides</i>      | CIT2054  | 2  | 1140 | EU544668 |     |          | MG: Januária (2)          | ?     | Southern Caatinga |
| <i>T. apereoides</i>      | LBCE5560 | 3  | 1140 | JX459852 | 743 | JX459844 | MG: Capitão Andrade (3)   | -     | Southern Caatinga |
| <i>T. apereoides</i>      | LBCE5561 | 3  | 1140 | JX459853 | 744 | JX459831 | MG: Capitão Andrade (3)   | 28/50 | Southern Caatinga |
| <i>T. apereoides</i>      | LBCE5575 | 3  | 1140 | JX459854 | 743 | JX459843 | MG: Capitão Andrade (3)   | -     | Southern Caatinga |
| <i>T. aff. apereoides</i> | CRB1548  | 4  | 1085 | AY083337 |     |          | BA: Jaborandi (4)         | -     | Northern Cerrado  |
| <i>T. aff. apereoides</i> | CRB1559  | 5  | 1110 | AY083336 |     |          | BA: Jaborandi (4)         | -     | Northern Cerrado  |
| <i>T. aff. apereoides</i> | CRB1595  | 5  | 1110 | AY083342 | 743 | JX459848 | BA: Jaborandi (4)         | -     | Northern Cerrado  |
| <i>T. aff. apereoides</i> | CRB1848  | 5  | 993  | AY083339 |     |          | BA: Jaborandi (4)         | -     | Northern Cerrado  |
| <i>T. aff. apereoides</i> | CRB1876  | 6  | 1031 | JX459855 |     |          | BA: Jaborandi (4)         | 28/52 | Northern Cerrado  |
| <i>T. laurentius</i>      | LV-X102  | 7  | 1140 | AY083338 |     |          | AL: Delmiro Gouveia (5)   | ?     | Northern Caatinga |
| <i>T. laurentius</i>      | LBCE852  | 8  | 1140 | JX459856 |     |          | PI: Coronel José Dias (6) | -     | Northern Caatinga |
| <i>T. laurentius</i>      | LBCE854  | 9  | 1140 | JX459857 |     |          | PI: Coronel José Dias (6) | -     | Northern Caatinga |
| <i>T. laurentius</i>      | LBCE855  | 10 | 1140 | JX459858 | 744 | JX459834 | PI: Coronel José Dias (6) | -     | Northern Caatinga |
| <i>T. laurentius</i>      | LBCE856  | 11 | 1140 | AY083333 |     |          | PI: Coronel José Dias (6) | 30/54 | Northern Caatinga |
| <i>T. laurentius</i>      | LBCE857  | 12 | 1140 | JX459859 |     |          | PI: Coronel José Dias (6) | -     | Northern Caatinga |
| <i>T. laurentius</i>      | LBCE859  | 13 | 1140 | JX459860 |     |          | PI: Coronel José Dias (6) | -     | Northern Caatinga |
| <i>T. laurentius</i>      | LBCE861  | 14 | 1140 | JX459861 |     |          | PI: Coronel José Dias (6) | -     | Northern Caatinga |
| <i>T. laurentius</i>      | LBCE862  | 15 | 1140 | AY083334 |     |          | PI: Coronel José Dias (6) | -     | Northern Caatinga |
| <i>T. laurentius</i>      | LBCE880  | 16 | 1140 | JX459862 |     |          | PI: Coronel José Dias (6) | -     | Northern Caatinga |
| <i>T. laurentius</i>      | LBCE889  | 17 | 1140 | JX459863 |     |          | PI: Coronel José Dias (6) | -     | Northern Caatinga |
| <i>T. laurentius</i>      | LBCE890  | 18 | 1140 | JX459864 |     |          | PI: Coronel José Dias (6) | -     | Northern Caatinga |

|                           |          |    |      |          |     |          |                             |       |                   |
|---------------------------|----------|----|------|----------|-----|----------|-----------------------------|-------|-------------------|
| <i>T. laurentius</i>      | LBCE1340 | 19 | 700  | AY083335 | 744 | JX459836 | PI: Coronel José Dias (6)   | -     | Northern Caatinga |
| <i>T. laurentius</i>      | LBCE1231 | 20 | 1140 | JX459865 |     |          | PI: João Costa (7)          | ?     | Northern Caatinga |
| <i>T. laurentius</i>      | LBCE1232 | 21 | 1140 | JX459866 |     |          | PI: João Costa (7)          | ?     | Northern Caatinga |
| <i>T. laurentius</i>      | LBCE1234 | 21 | 1140 | JX459867 |     |          | PI: João Costa (7)          | ?     | Northern Caatinga |
| <i>T. laurentius</i>      | LBCE1241 | 22 | 1140 | JX459868 |     |          | PI: João Costa (7)          | ?     | Northern Caatinga |
| <i>T. laurentius</i>      | LBCE1243 | 23 | 1140 | JX459869 |     |          | PI: João Costa (7)          | ?     | Northern Caatinga |
| <i>T. laurentius</i>      | LBCE1244 | 24 | 1140 | JX459870 |     |          | PI: João Costa (7)          | ?     | Northern Caatinga |
| <i>T. laurentius</i>      | LBCE1246 | 25 | 1140 | JX459871 |     |          | PI: João Costa (7)          | ?     | Northern Caatinga |
| <i>T. laurentius</i>      | LBCE1248 | 26 | 1140 | JX459872 |     |          | PI: João Costa (7)          | ?     | Northern Caatinga |
| <i>T. laurentius</i>      | LBCE1256 | 27 | 1140 | JX459873 |     |          | PI: João Costa (7)          | ?     | Northern Caatinga |
| <i>T. laurentius</i>      | LBCE1258 | 28 | 1140 | JX459874 |     |          | PI: João Costa (7)          | ?     | Northern Caatinga |
| <i>T. laurentius</i>      | LBCE1262 | 29 | 1140 | JX459875 |     |          | PI: João Costa (7)          | ?     | Northern Caatinga |
| <i>T. laurentius</i>      | LBCE1264 | 30 | 1140 | JX459876 |     |          | PI: João Costa (7)          | ?     | Northern Caatinga |
| <i>T. laurentius</i>      | LBCE1257 | 31 | 1140 | AY083332 |     |          | PI: João Costa (7)          | ?     | Northern Caatinga |
| <i>T. laurentius</i>      | LBCE4231 | 31 | 1140 | JX459878 |     |          | PI: São Raimundo Nonato (8) | -     | Northern Caatinga |
| <i>T. laurentius</i>      | LBCE4241 | 31 | 1140 | JX459881 |     |          | PI: São Raimundo Nonato (8) | -     | Northern Caatinga |
| <i>T. laurentius</i>      | LBCE4230 | 32 | 1140 | JX459877 |     |          | PI: São Raimundo Nonato (8) | -     | Northern Caatinga |
| <i>T. laurentius</i>      | LBCE4234 | 33 | 1140 | JX459879 | 744 | JX459835 | PI: São Raimundo Nonato (8) | -     | Northern Caatinga |
| <i>T. laurentius</i>      | LBCE4238 | 34 | 1140 | JX459880 |     |          | PI: São Raimundo Nonato (8) | -     | Northern Caatinga |
| <i>T. laurentius</i>      | LBCE4245 | 35 | 1140 | JX459882 |     |          | PI: São Raimundo Nonato (8) | -     | Northern Caatinga |
| <i>T. laurentius</i>      | LBCE4253 | 36 | 1140 | JX459883 |     |          | PI: São Raimundo Nonato (8) | -     | Northern Caatinga |
| <i>T. laurentius</i>      | LBCE4262 | 37 | 1140 | JX459884 |     |          | PI: São Raimundo Nonato (8) | -     | Northern Caatinga |
| <i>T. aff. laurentius</i> | LBCE1505 | 38 | 1140 | AY083344 | 743 | JX459832 | BA: Caetité (9)             | 30/54 | Southern Caatinga |
| <i>T. aff. laurentius</i> | LBCE1527 | 38 | 1140 | JX459885 |     |          | BA: Caetité (9)             | -     | Southern Caatinga |
| <i>T. inermis</i>         | LBCE4906 | 39 | 1140 | JX459886 |     |          | BA: Curaçá (10)             | -     | Central Caatinga  |
| <i>T. inermis</i>         | LBCE4921 | 40 | 1140 | JX459887 | 743 | JX459845 | BA: Curaçá (10)             | -     | Central Caatinga  |
| <i>T. inermis</i>         | LBCE1302 | 41 | 802  | AY083343 | 744 | JX459847 | BA: Sento Sé (11)           | 26/48 | Central Caatinga  |
| <i>T. inermis</i>         | BIO 872  | 42 | 1140 | U34855   |     |          | BA: Santo Inácio (12)       | ?     | Central Caatinga  |

|                        |           |    |      |          |     |          |                            |       |                  |
|------------------------|-----------|----|------|----------|-----|----------|----------------------------|-------|------------------|
| <i>T. aff. inermis</i> | LBCE12000 | 43 | 1140 | JX459888 | 744 | JX459841 | TO: Novo Jardim (13)       | 26/48 | Northern Cerrado |
| <i>T. aff. inermis</i> | LBCE12001 | 43 | 1140 | JX459889 | 744 | JX459837 | TO: Novo Jardim (13)       | 26/48 | Northern Cerrado |
| <i>T. aff. inermis</i> | LBCE12020 | 43 | 1140 | JX459893 | 744 | JX459842 | TO: Novo Jardim (13)       | 26/48 | Northern Cerrado |
| <i>T. aff. inermis</i> | LBCE12015 | 44 | 1140 | JX459891 | 744 | JX459838 | TO: Novo Jardim (13)       | 26/48 | Northern Cerrado |
| <i>T. aff. inermis</i> | LBCE12009 | 45 | 1140 | JX459890 |     |          | TO: Novo Jardim (13)       | 26/48 | Northern Cerrado |
| <i>T. aff. inermis</i> | LBCE12017 | 46 | 1140 | JX459892 |     |          | TO: Novo Jardim (13)       | 26/48 | Northern Cerrado |
| <i>T. fosteri</i>      | CRB553    | 47 | 1140 | JX459894 |     |          | MS: Bela Vista (14)        | ?     | Southern Cerrado |
| <i>T. fosteri</i>      | LBCE1920  | 48 | 1140 | AY083329 | 744 | JX459833 | MS: Corumbá (15)           | 34/64 | Southern Cerrado |
| <i>T. fosteri</i>      | LBCE1903  | 49 | 1096 | AY083328 | 744 | JX459846 | MS: Corumbá (15)           | -     | Southern Cerrado |
| <i>T. fosteri</i>      | LBCE1960  | 49 | 1123 | AY083340 |     |          | MS: Corumbá (15)           | 34/64 | Southern Cerrado |
| <i>T. fosteri</i>      | MVZ197573 | 50 | 798  | EU313253 |     |          | MS: Fazenda Taboco (16)    | ?     | Southern Cerrado |
| <i>T. fosteri</i>      | MVZ197572 | 51 | 798  | EU313252 |     |          | MS: Fazenda Taboco (16)    | ?     | Southern Cerrado |
| <i>T. pachyurus</i>    | RGR350    | 52 | 801  | HM594625 |     |          | TO: Caseara (17)           | ?     | Northern Cerrado |
| <i>T. pachyurus</i>    | RGR353    | 53 | 797  | HM594626 |     |          | TO: Caseara (17)           | ?     | Northern Cerrado |
| <i>T. pachyurus</i>    | CRB899    | 54 | 1109 | AY083331 |     |          | GO: Teresina de Goiás (18) | 30/56 | Northern Cerrado |
| <i>T. pachyurus</i>    | CRB2357   | 55 | 1140 | JX459895 |     |          | GO: Mimoso de Goiás (19)   | ?     | Northern Cerrado |
| <i>T. pachyurus</i>    | LBCE15469 | 56 | 1140 | JX459896 |     |          | MT: Cuiaba (20)            | 30/56 | Central Cerrado  |
| <i>T. pachyurus</i>    | LBCE15471 | 57 | 1140 | JX459897 | 743 | JX459839 | MT: Cuiaba (20)            | 30/56 | Central Cerrado  |
| <i>T. pachyurus</i>    | LBCE15477 | 58 | 1140 | JX459898 |     |          | MT: Cuiaba (20)            | 30/56 | Central Cerrado  |
| <i>T. pachyurus</i>    | LBCE15479 | 59 | 1140 | JX459899 | 743 | JX459840 | MT: Cuiaba (20)            | 30/56 | Central Cerrado  |

Brazilian states corresponds to MG = Minas Gerais, BA = Bahia, AL = Alagoas, PI = Piauí, TO = Tocantins, MS = Mato Grosso do Sul, GO = Goiás, MT = Mato Grosso; - = karyotype known for the locality, but not available for these specimens, ? = karyotype from the locality is unknown
